# Supplementary material for: Heterointerface engineering constructs microenvironment enhancing catalytic kinetics of Fe/Ni oxyhydroxide@FeNi alloy for overall water splitting
Source: Royal Society of Chemistry journal article supplement (doi:10.1039/d2nj05473f), 2022-11-25
Supplement: d2nj05473f1.pdf [file d2nj05473f1.pdf]

## Supporting Information

### **Heterointerface Engineering Constructs Microenvironment Enhancing Catalytic Kinetics of Fe/Ni oxyhydroxide@FeNi alloy for Overall Water Splitting**

*Kewen Ma<sup>a</sup>, Xueru Chang<sup>a</sup>, Renchao Deng<sup>a</sup>, Xiao Wu<sup>a</sup>, Zehua Wang<sup>a</sup>, and Hao Yang\**

<sup>a</sup>Guangxi Key Laboratory of Electrochemical Energy Materials, School of Chemistry & Chemical Engineering, Guangxi University, Nanning, 530004, China.

Prof. Hao Yang

Guangxi Key Laboratory of Electrochemical Energy Materials, School of Chemistry & Chemical Engineering, Guangxi University, Nanning, 530004, China

Email: yanghao@gxu.edu.cn

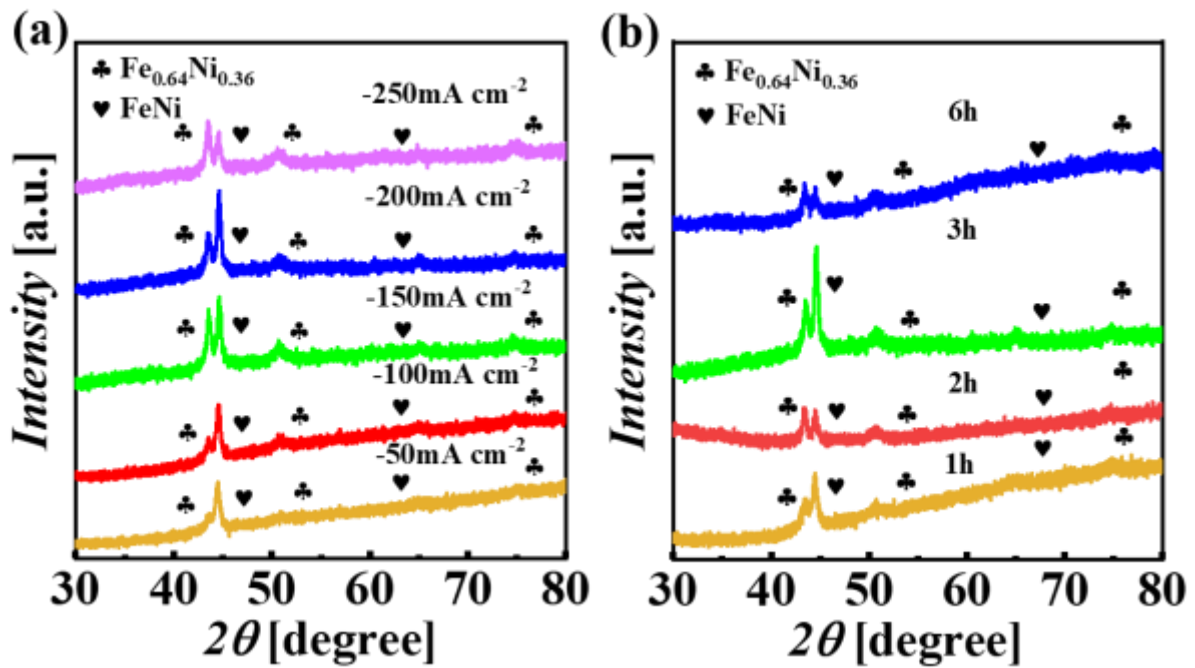

**Figure S1.** XRD patterns of FeNi-(1:1)  $O_x(OH)_y$  at different deposition currents and deposition time.

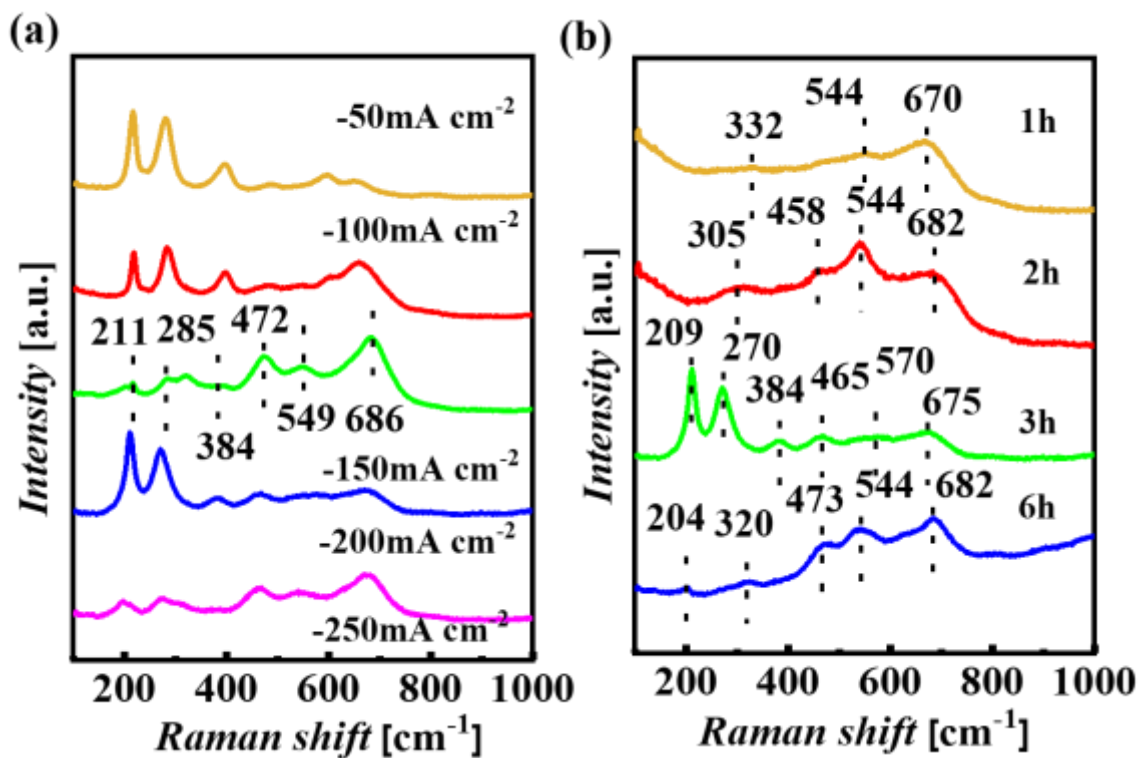

**Figure S2.** Raman spectra of FeNi-(1:1)  $O_x(OH)_y$  at different deposition currents and deposition time.

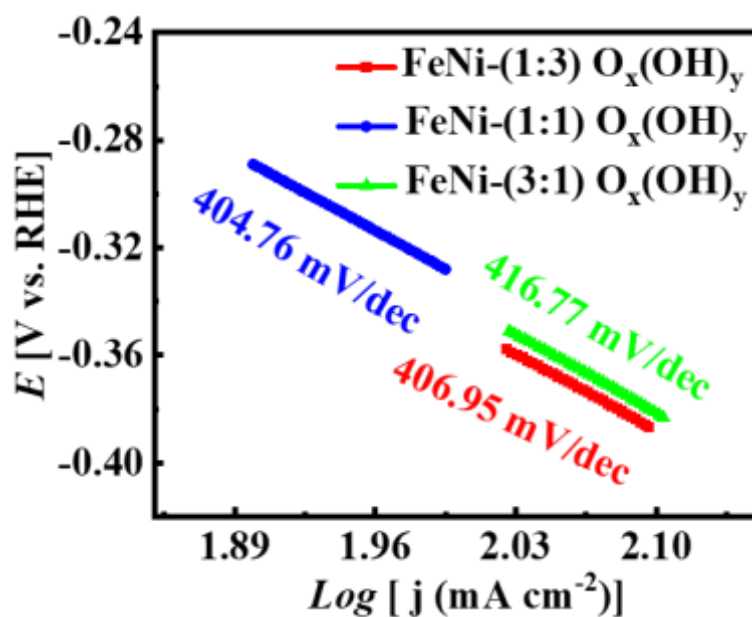

**Figure S3.** The Tafel slope was calculated at the current density of  $100 \text{ mA cm}^{-2}$  for HER.

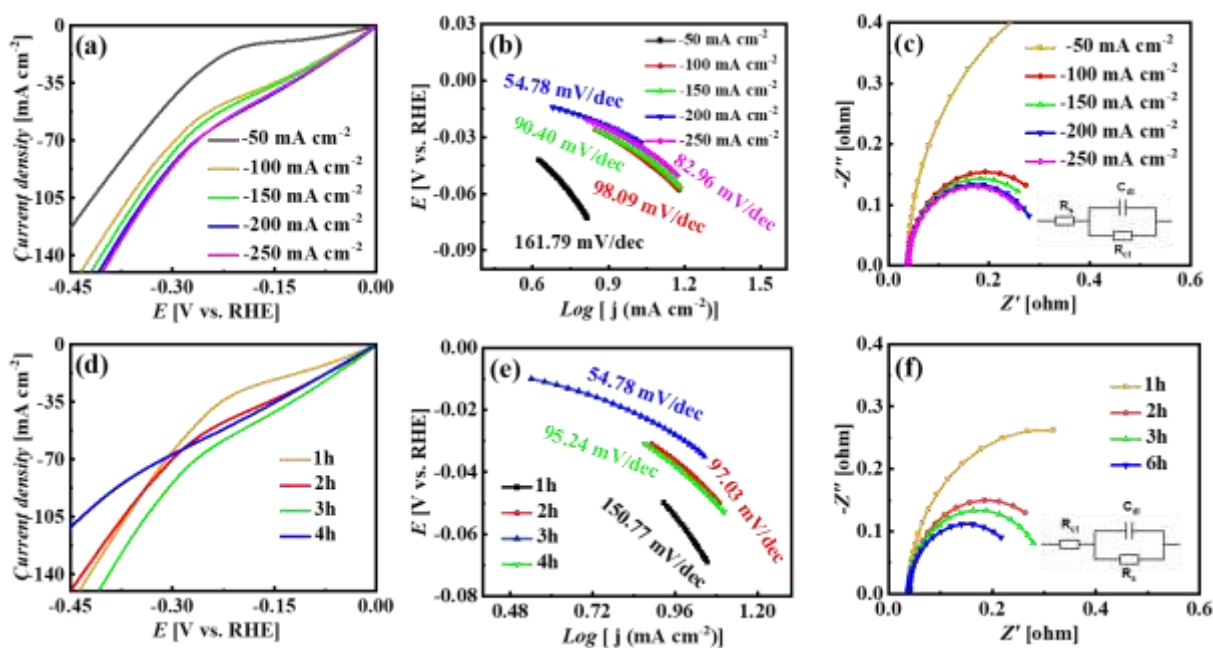

**Figure S4.** LSV, Tafel plots, and Nyquist plots of  $\text{FeNi-(1:1) O}_x(\text{OH})_y$  at different deposition currents and deposition time.

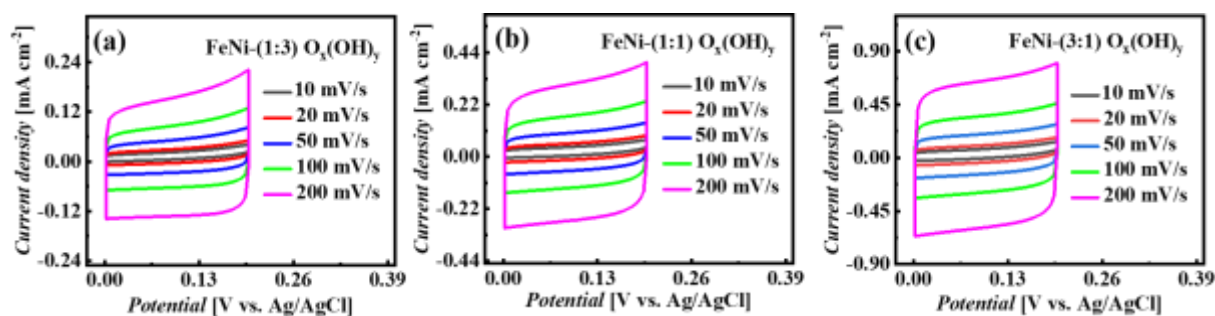

**Figure S5.** Charging currents measured in the non-Faradaic potential range of 0 to 0.2 V vs. Ag/AgCl at scan rates of 10, 20, 50, 100, 200 mV/s, FeNi-(1:3)  $O_x(OH)_y$  (a), FeNi-(1:1)  $O_x(OH)_y$  (b), FeNi-(3:1)  $O_x(OH)_y$  (c).

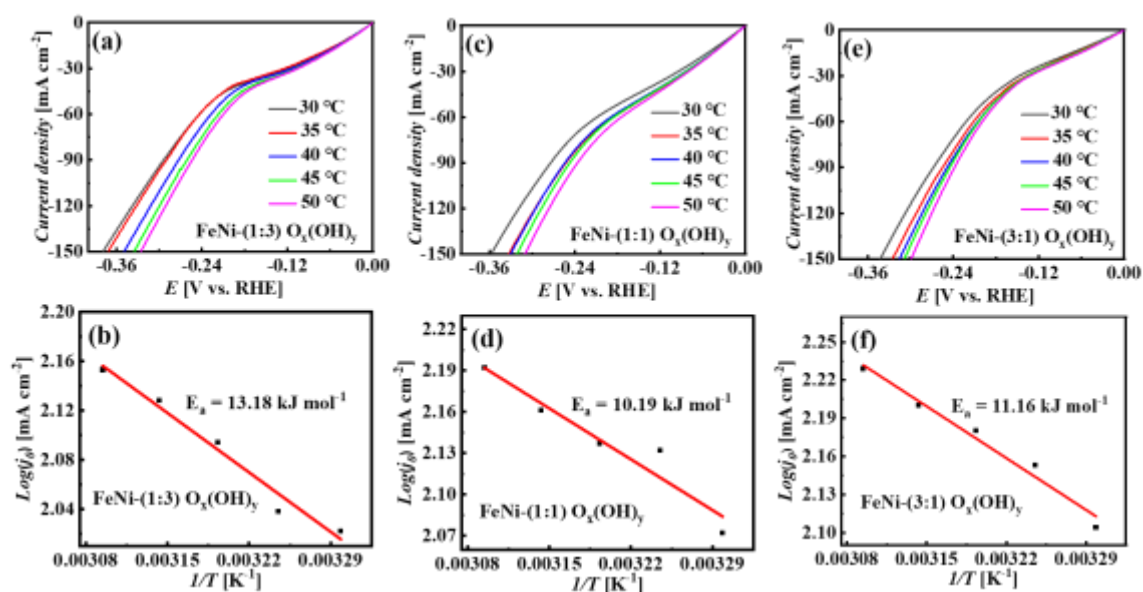

**Figure S6.** The figure of the polarization curves at different electrolyte temperatures correspond to Arrhenius plots of FeNi-(1:3)  $O_x(OH)_y$ , FeNi-(1:1)  $O_x(OH)_y$ , and FeNi-(3:1)  $O_x(OH)_y$  for HER.

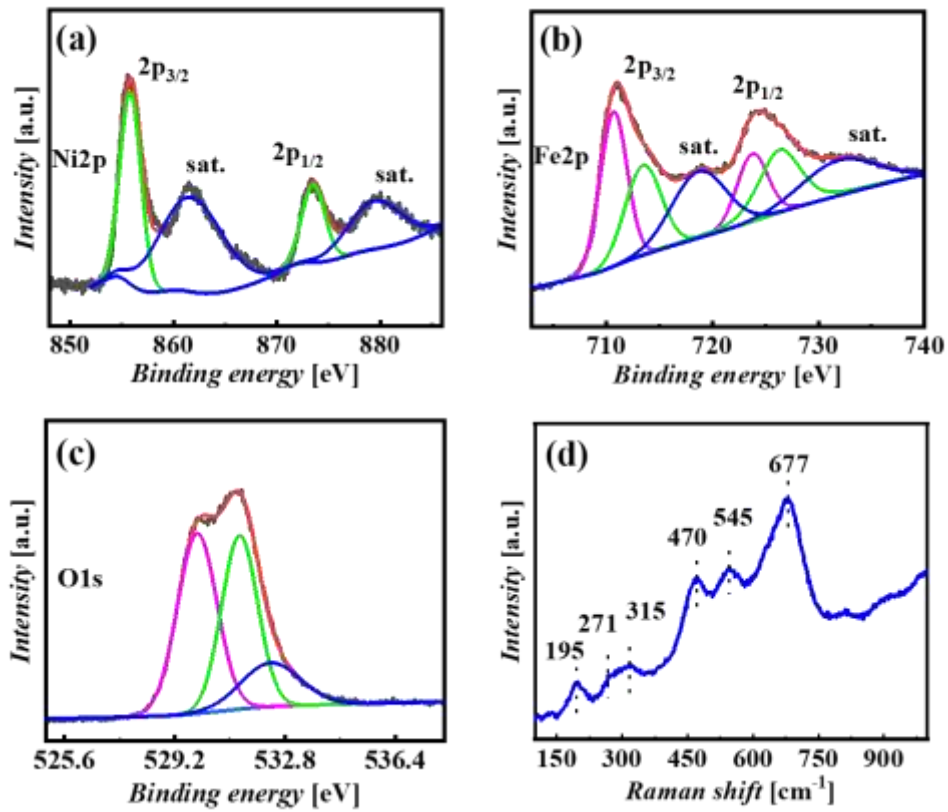

**Figure S7.** The XPS survey and Raman spectra of FeNi-(1:1)  $O_x(OH)_y$  as cathode for HER after stability test.

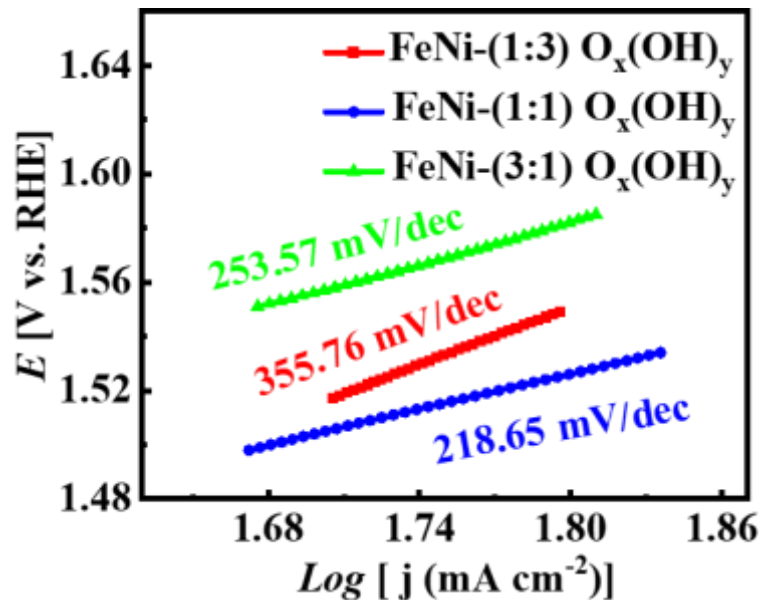

**Figure S8.** The Tafel slope was calculated at the current density of  $100 \text{ mA cm}^{-2}$  for OER.

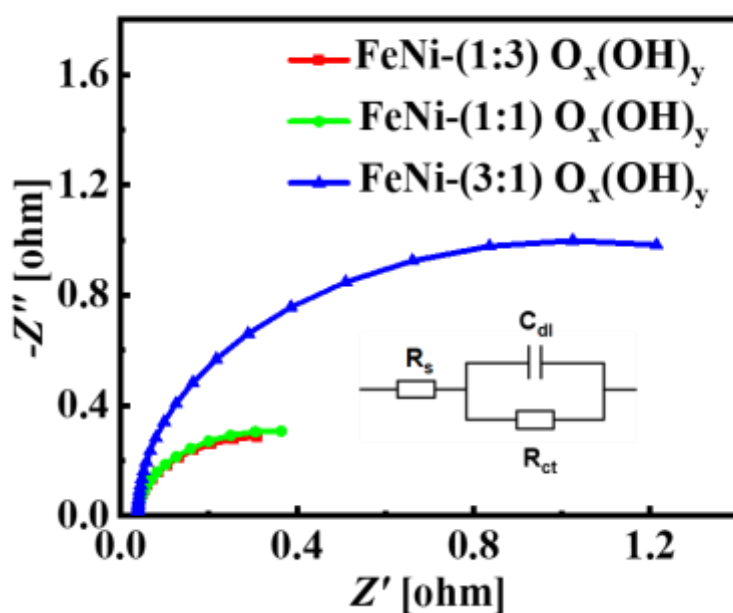

**Figure S9.** Nyquist plots for corresponding electrodes for OER.

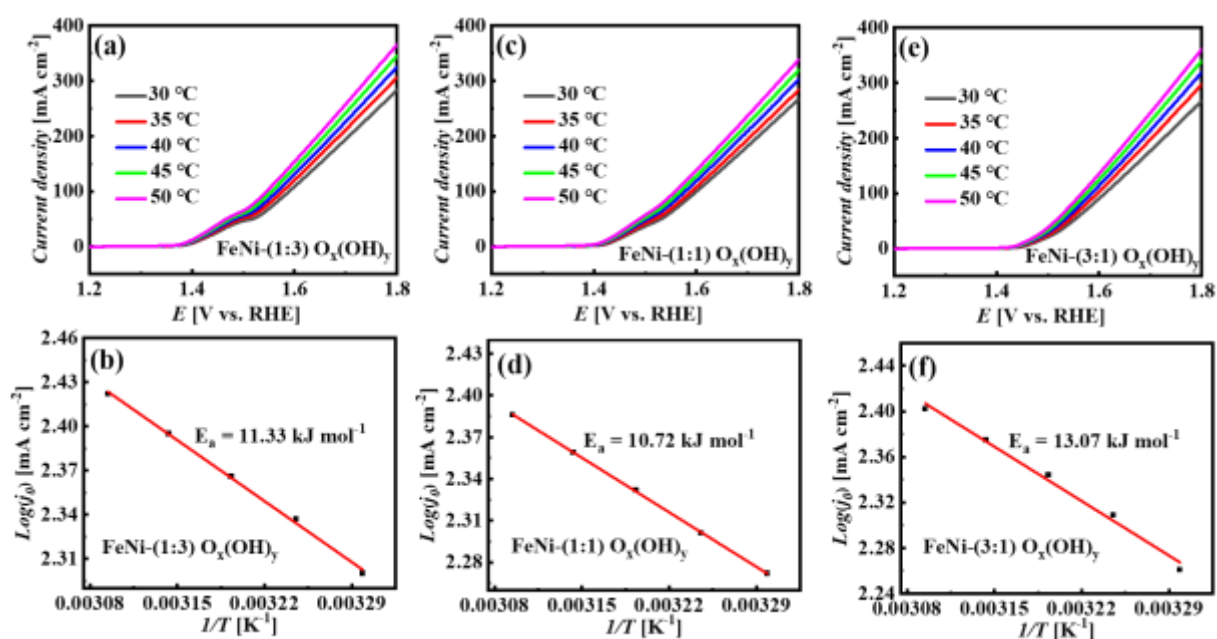

**Figure S10.** The figure of the polarization curves at different electrolyte temperatures correspond to Arrhenius plots of FeNi-(1:3)  $O_x(OH)_y$ , FeNi-(1:1)  $O_x(OH)_y$ , and FeNi-(3:1)  $O_x(OH)_y$  for OER.

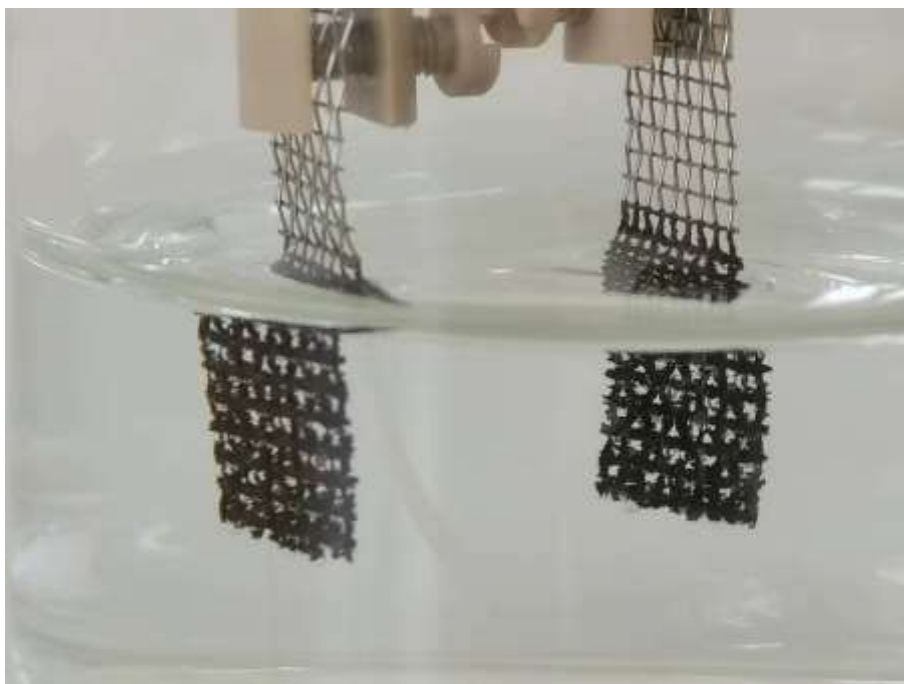

**Figure S11.** Overall water splitting for the device with FeNi-(1:1)  $\text{O}_x(\text{OH})_y \parallel \text{FeNi-(1:1)} \text{O}_x(\text{OH})_y$  and 1.5 V battery. The video can be viewed in support materials.

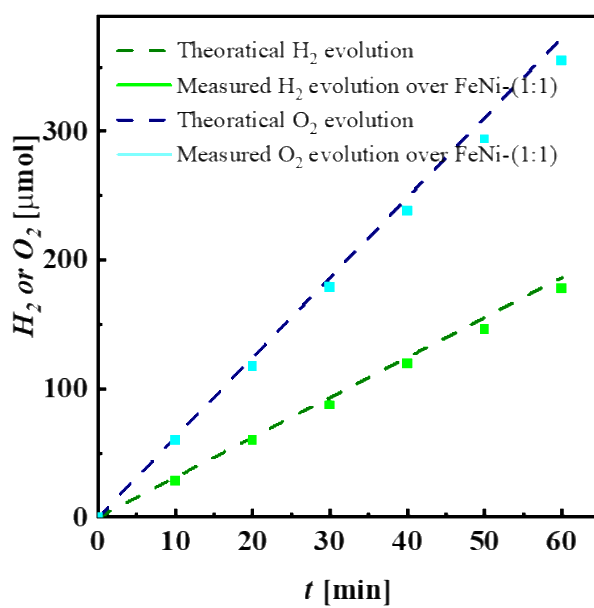

**Figure S12.** Experimental and theoretical amounts of  $\text{H}_2$  and  $\text{O}_2$  by the FeNi-(1:1)  $\text{O}_x(\text{OH})_y$  electrode at a fixed current density of  $10 \text{ mA cm}^{-2}$ .

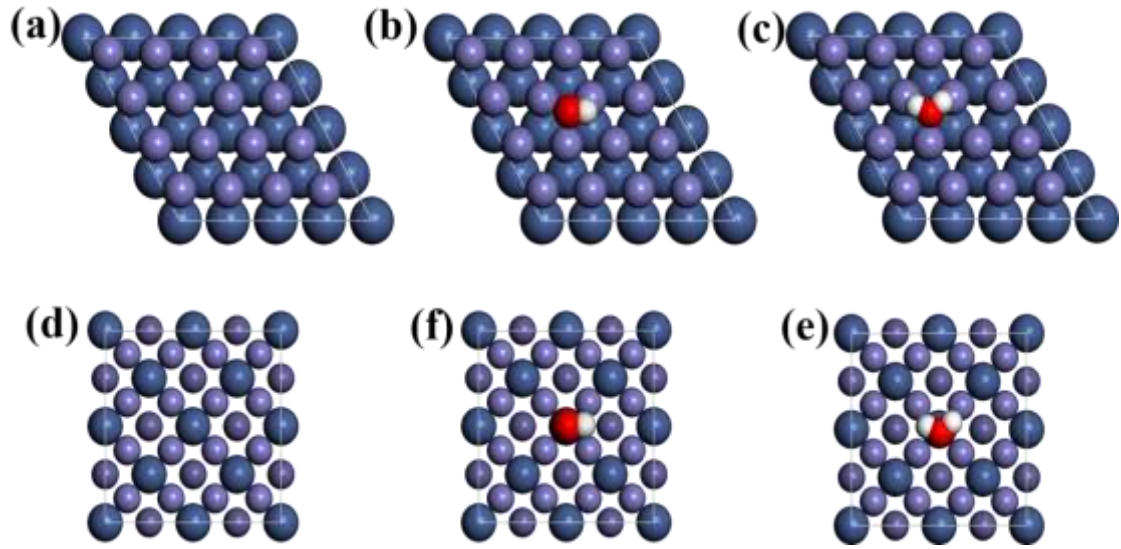

**Figure S13.** Models of kamacite and Fe<sub>0.64</sub>Ni<sub>0.36</sub> were used to simulate the interface in FeNi-(1:3) O<sub>x</sub>(OH)<sub>y</sub>, FeNi-(1:1) O<sub>x</sub>(OH)<sub>y</sub>, FeNi-(3:1) O<sub>x</sub>(OH)<sub>y</sub>.



**Table S1**

Comparison of the obtained cell voltage in this study with those of the recently reported bifunctional electrocatalysts for overall water-splitting in alkaline solution.

| Materials                                       | Electrolyte      | Cell voltage (V) | J (mA cm <sup>-2</sup> ) | Ref.             |
|-------------------------------------------------|------------------|------------------|--------------------------|------------------|
| <b>FeNi-(1:1) O<sub>x</sub>(OH)<sub>y</sub></b> | <b>1.0 M KOH</b> | <b>1.897</b>     | <b>100</b>               | <b>This work</b> |
| W-NiFe                                          | 1.0 M KOH        | 1.59             | 10                       | 1                |
| NiFe@Co(OH) <sub>2</sub><br>NSAs/NF             | 1.0 M KOH        | 1.58             | 10                       | 2                |
| Ce-NiFe-LDH                                     | 1.0 M KOH        | 1.59             | 10                       | 3                |
| NiFe(OH) <sub>x</sub>                           | 1.0 M KOH        | 1.80             | 100                      | 4                |
| NiFe-LDH@Ni(OH) <sub>2</sub>                    | 1.0 M KOH        | 1.80             | 100                      | 5                |
| Fe-CoNi-LDH                                     | 1.0 M KOH        | 1.81             | 100                      | 6                |
| Fe(OH) <sub>3</sub> /β-Ni(OH) <sub>2</sub>      | 1.0 M KOH        | 1.83             | 400                      | 7                |
| NiFeMo alloy                                    | 1.0 M KOH        | 1.75             | 500                      | 8                |
| NiFe<br>oxyhydroxide@NiFe<br>alloy              | 1.0 M KOH        | 1.76             | 1000                     | 9                |

## Reference

1. L. Ding, K. Li, Z. Xie, G. Yang, S. Yu, W. Wang, H. Yu, J. Baxter, H. M. Meyer, D. A. Cullen and F. Y. Zhang, *ACS Appl Mater Interfaces*, 2021, **13**, 20070-20080.
2. C. Cheng, F. Liu, D. Zhong, G. Hao, G. Liu, J. Li and Q. Zhao, *J Colloid Interface Sci.* 2022, **606**, 873-883.
3. H. S. Jadhav, A. Roy, B. Z. Desalegan and J. G. Seo, *Sustainable Energy Fuels*, 2020, **4**, 312-323.
4. S. Zhu, G. Duan, C. Chang, Y. Chen, Y. Sun, Y. Tang, P. Wan and J. Pan, *ACS Sustainable Chem. Eng.* 2020, **8**, 9885-9895.
5. N. S. Gultom, H. Abdullah, C.-N. Hsu and D.-H. Kuo, *Chem. Eng. J.* 2021, **419**, 129608.
6. Z. Zhai, W. Yan and J. Zhang, *Nanoscale*, 2022, **14**, 4156-4169.
7. B. Wu, Z. Yang, X. Dai, X. Yin, Y. Gan, F. Nie, Z. Ren, Y. Cao, Z. Li and X. Zhang, *Dalton Trans.* 2021, **50**, 12547-12554.
8. C.-T. Hsieh, C.-L. Huang, Y.-A. Chen and S.-Y. Lu, *Appl. Catal. , B*, 2020, **267**, 118376.
9. C. Liang, P. Zou, A. Nairan, Y. Zhang, J. Liu, K. Liu, S. Hu, F. Kang, H. J. Fan and C. Yang, *Energy Environ. Sci.* 2020, **13**, 86-95.
